# Supplementary material for: Seven dicarboxylate-based coordination polymers with structural varieties and different solvent resistance properties derived from the introduction of small organic linkers
Source: Royal Society of Chemistry journal article supplement (doi:10.1039/c3ce42366b), 2013-12-23
Supplement: c3ce42366b.pdf [file c3ce42366b.pdf]

# Seven Dicarboxylate-Based Coordination Polymers with Structural Varieties and Solvent Resistance Property Changing Derived from the Introduction of Small Organic Linkers

*Chao Huang, Feixiang Ji, Lu Liu, Na Li, Haofei Li, Jie Wu\*, Hongwei Hou\*, Yaoting Fan*

The College of Chemistry and Molecular Engineering, Zhengzhou University, Zhengzhou,  
Henan, 450052, P. R. China

\* To whom correspondence should be addressed. Fax: (86) 0371-67761744;

E-mail: [wujie@zzu.edu.cn](mailto:wujie@zzu.edu.cn)

E-mail: [houghongw@zzu.edu.cn](mailto:houghongw@zzu.edu.cn)

**Table S1.** Selected Bond Lengths (Å) and Bond Angles (deg) for 1–7

| Compound 1                                                                                   |            |                       |            |
|----------------------------------------------------------------------------------------------|------------|-----------------------|------------|
| Co(1)-O(7)                                                                                   | 2.054(5)   | Co(2)-O(17)           | 2.056(6)   |
| Co(1)-O(2)                                                                                   | 2.062(5)   | Co(2)-O(1)            | 2.075(6)   |
| Co(1)-O(14)                                                                                  | 2.063(5)   | Co(2)-O(2)            | 2.280(5)   |
| Co(1)-O(5)#1                                                                                 | 2.092(5)   | Co(2)-O(16)           | 2.294(12)  |
| Co(1)-O(13)#2                                                                                | 2.109(6)   | Co(3)-O(12)#2         | 1.938(5)   |
| Co(1)-O(21)#3                                                                                | 2.127(6)   | Co(3)-O(20)#3         | 1.956(6)   |
| Co(2)-O(6)#1                                                                                 | 1.997(5)   | Co(3)-O(8)            | 1.971(5)   |
| Co(2)-O(15)                                                                                  | 2.032(6)   | Co(3)-O(9)            | 2.149(11)  |
| O(7)-Co(1)-O(2)                                                                              | 176.2(3)   | O(6)#1-Co(2)-O(1)     | 153.5(2)   |
| O(7)-Co(1)-O(14)                                                                             | 85.7(2)    | O(15)-Co(2)-O(1)      | 97.5(3)    |
| O(2)-Co(1)-O(14)                                                                             | 97.7(2)    | O(17)-Co(2)-O(1)      | 101.8(3)   |
| O(7)-Co(1)-O(5)#1                                                                            | 89.5(2)    | O(6)#1-Co(2)-O(2)     | 95.8(2)    |
| O(2)-Co(1)-O(5)#1                                                                            | 88.6(2)    | O(15)-Co(2)-O(2)      | 99.4(2)    |
| O(14)-Co(1)-O(5)#1                                                                           | 94.1(2)    | O(17)-Co(2)-O(2)      | 159.3(2)   |
| O(7)-Co(1)-O(13)#2                                                                           | 95.4(2)    | O(1)-Co(2)-O(2)       | 59.2(2)    |
| O(2)-Co(1)-O(13)#2                                                                           | 86.5(2)    | O(6)#1-Co(2)-O(16)    | 82.6(3)    |
| O(14)-Co(1)-O(13)#2                                                                          | 86.0(2)    | O(15)-Co(2)-O(16)     | 176.9(3)   |
| O(5)#1-Co(1)-O(13)#2                                                                         | 175.1(2)   | O(17)-Co(2)-O(16)     | 87.6(3)    |
| O(7)-Co(1)-O(21)#3                                                                           | 86.5(2)    | O(1)-Co(2)-O(16)      | 85.4(3)    |
| O(2)-Co(1)-O(21)#3                                                                           | 90.2(2)    | O(2)-Co(2)-O(16)      | 82.9(3)    |
| O(14)-Co(1)-O(21)#3                                                                          | 171.3(2)   | O(12)#2-Co(3)-O(20)#3 | 124.6(3)   |
| O(5)#1-Co(1)-O(21)#3                                                                         | 89.8(2)    | O(12)#2-Co(3)-O(8)    | 113.3(3)   |
| O(13)#2-Co(1)-O(21)#3                                                                        | 90.8(2)    | O(20)#3-Co(3)-O(8)    | 114.6(3)   |
| O(6)#1-Co(2)-O(15)                                                                           | 95.2(3)    | O(12)#2-Co(3)-O(9)    | 98.1(3)    |
| O(6)#1-Co(2)-O(17)                                                                           | 101.2(2)   | O(20)#3-Co(3)-O(9)    | 98.6(4)    |
| O(15)-Co(2)-O(17)                                                                            | 90.8(2)    | O(8)-Co(3)-O(9)       | 100.9(3)   |
| Symmetry codes: #1 = -x+1, y+1/2, -z+1/2; #2 = -x+2, y-1/2, -z+1/2; #3 = x-1, -y+3/2, z-1/2. |            |                       |            |
| Compound 2                                                                                   |            |                       |            |
| Co(1)-O(1)#1                                                                                 | 2.010(2)   | Co(2)-O(1)            | 2.074(2)   |
| Co(1)-O(8)#2                                                                                 | 2.013(3)   | Co(2)-N(2)            | 2.083(3)   |
| Co(1)-N(3)                                                                                   | 2.018(3)   | Co(2)-N(1)#3          | 2.089(3)   |
| Co(1)-O(4)#1                                                                                 | 2.068(2)   | Co(2)-O(7)#4          | 2.195(3)   |
| Co(1)-O(1)                                                                                   | 2.167(2)   | Co(2)-O(2)            | 2.196(3)   |
| Co(2)-O(3)                                                                                   | 2.069(2)   | O(1)-Co(2)-N(2)       | 88.14(9)   |
| O(1)#1-Co(1)-O(8)#2                                                                          | 125.56(10) | O(3)-Co(2)-N(1)#3     | 87.10(10)  |
| O(1)#1-Co(1)-N(3)                                                                            | 115.80(10) | O(1)-Co(2)-N(1)#3     | 176.60(10) |
| O(8)#2-Co(1)-N(3)                                                                            | 116.40(11) | N(2)-Co(2)-N(1)#3     | 94.28(10)  |
| O(1)#1-Co(1)-O(4)#1                                                                          | 98.65(9)   | O(3)-Co(2)-O(7)#4     | 88.06(10)  |
| O(8)#2-Co(1)-O(4)#1                                                                          | 94.05(10)  | O(1)-Co(2)-O(7)#4     | 95.76(10)  |

|                                                                                                                   |            |                     |            |
|-------------------------------------------------------------------------------------------------------------------|------------|---------------------|------------|
| N(3)-Co(1)-O(4)#1                                                                                                 | 91.88(10)  | N(2)-Co(2)-O(7)#4   | 89.47(11)  |
| O(1)#1-Co(1)-O(1)                                                                                                 | 79.19(9)   | N(1)#3-Co(2)-O(7)#4 | 86.66(11)  |
| O(8)#2-Co(1)-O(1)                                                                                                 | 89.00(10)  | O(3)-Co(2)-O(2)     | 87.25(10)  |
| N(3)-Co(1)-O(1)                                                                                                   | 87.14(9)   | O(1)-Co(2)-O(2)     | 90.57(10)  |
| O(4)#1-Co(1)-O(1)                                                                                                 | 176.92(9)  | N(2)-Co(2)-O(2)     | 95.38(10)  |
| O(3)-Co(2)-O(1)                                                                                                   | 90.59(9)   | N(1)#3-Co(2)-O(2)   | 86.83(11)  |
| O(3)-Co(2)-N(2)                                                                                                   | 177.09(10) | O(7)#4-Co(2)-O(2)   | 172.16(10) |
| Symmetry codes: #1 = -x+2, -y+1, -z; #2 = x+1/2, y, -z+1/2; #3 = y+1/4, -x+7/4, -z-1/4; #4 = -x+3/2, -y+1, z-1/2. |            |                     |            |

### Compound 3

|                                                              |          |                     |          |
|--------------------------------------------------------------|----------|---------------------|----------|
| Co(1)-N(3)                                                   | 2.079(8) | Co(2)-O(1)#1        | 2.002(8) |
| Co(1)-N(2)                                                   | 2.080(7) | Co(2)-O(7)          | 2.017(6) |
| Co(1)-O(5)                                                   | 2.080(7) | Co(2)-N(1)#2        | 2.017(7) |
| Co(1)-O(7)                                                   | 2.100(6) | Co(2)-O(6)          | 2.079(7) |
| Co(1)-O(2)#1                                                 | 2.161(8) | Co(2)-O(7)#2        | 2.177(6) |
| Co(1)-O(8)                                                   | 2.220(8) | O(5)-Co(1)-O(8)     | 86.9(3)  |
| N(3)-Co(1)-N(2)                                              | 98.3(3)  | O(7)-Co(1)-O(8)     | 86.9(3)  |
| N(3)-Co(1)-O(5)                                              | 85.7(3)  | O(2)#1-Co(1)-O(8)   | 171.5(3) |
| N(2)-Co(1)-O(5)                                              | 173.8(3) | O(1)#1-Co(2)-O(7)   | 121.9(3) |
| N(3)-Co(1)-O(7)                                              | 171.4(3) | O(1)#1-Co(2)-N(1)#2 | 121.7(3) |
| N(2)-Co(1)-O(7)                                              | 88.0(3)  | O(7)-Co(2)-N(1)#2   | 114.4(3) |
| O(5)-Co(1)-O(7)                                              | 88.6(3)  | O(1)#1-Co(2)-O(6)   | 93.2(3)  |
| N(3)-Co(1)-O(2)#1                                            | 87.1(3)  | O(7)-Co(2)-O(6)     | 98.8(3)  |
| N(2)-Co(1)-O(2)#1                                            | 88.1(3)  | N(1)#2-Co(2)-O(6)   | 92.2(3)  |
| O(5)-Co(1)-O(2)#1                                            | 87.3(3)  | O(1)#1-Co(2)-O(7)#2 | 89.0(3)  |
| O(7)-Co(1)-O(2)#1                                            | 99.2(3)  | O(7)-Co(2)-O(7)#2   | 79.1(3)  |
| N(3)-Co(1)-O(8)                                              | 86.3(3)  | N(1)#2-Co(2)-O(7)#2 | 87.5(3)  |
| N(2)-Co(1)-O(8)                                              | 98.1(3)  | O(6)-Co(2)-O(7)#2   | 177.6(3) |
| Symmetry codes: #1 = -x+1/2, -y, z-1/2; #2 = -x+1, -y, -z+1. |          |                     |          |

### Compound 4

|                                         |            |                     |            |
|-----------------------------------------|------------|---------------------|------------|
| Co(1)-O(6)                              | 1.988(3)   | Co(1)-O(7)          | 2.127(4)   |
| Co(1)-N(3)                              | 2.100(3)   | Co(1)-N(1)          | 2.185(3)   |
| Co(1)-O(2)#1                            | 2.117(3)   | Co(1)-O(1)#1        | 2.232(3)   |
| O(6)-Co(1)-N(3)                         | 97.89(13)  | O(2)#1-Co(1)-N(1)   | 105.46(12) |
| O(6)-Co(1)-O(2)#1                       | 157.55(12) | O(7)-Co(1)-N(1)     | 90.10(14)  |
| N(3)-Co(1)-O(2)#1                       | 92.61(12)  | O(6)-Co(1)-O(1)#1   | 98.55(12)  |
| O(6)-Co(1)-O(7)                         | 92.45(16)  | N(3)-Co(1)-O(1)#1   | 94.25(12)  |
| N(3)-Co(1)-O(7)                         | 165.45(15) | O(2)#1-Co(1)-O(1)#1 | 60.75(10)  |
| O(2)#1-Co(1)-O(7)                       | 81.37(15)  | O(7)-Co(1)-O(1)#1   | 94.30(13)  |
| O(6)-Co(1)-N(1)                         | 96.06(13)  | N(1)-Co(1)-O(1)#1   | 164.54(11) |
| N(3)-Co(1)-N(1)                         | 78.69(13)  |                     |            |
| Symmetry codes: #1 = -x+1, y+1, -z+1/2. |            |                     |            |

### Compound 5

|                                                                                             |            |                     |            |
|---------------------------------------------------------------------------------------------|------------|---------------------|------------|
| Cu(1)-O(2)                                                                                  | 1.960(2)   | Cu(1)-O(1)#3        | 1.962(2)   |
| Cu(1)-O(2)#1                                                                                | 1.960(2)   | Cu(1)-O(4)          | 2.193(4)   |
| Cu(1)-O(1)#2                                                                                | 1.962(2)   | O(1)#2-Cu(1)-O(1)#3 | 88.37(15)  |
| O(2)-Cu(1)-O(2)#1                                                                           | 90.22(14)  | O(2)-Cu(1)-O(4)     | 99.66(11)  |
| O(2)-Cu(1)-O(1)#2                                                                           | 168.81(10) | O(2)#1-Cu(1)-O(4)   | 99.66(11)  |
| O(2)#1-Cu(1)-O(1)#2                                                                         | 89.62(11)  | O(1)#2-Cu(1)-O(4)   | 91.39(11)  |
| O(2)-Cu(1)-O(1)#3                                                                           | 89.62(11)  | O(1)#3-Cu(1)-O(4)   | 91.39(11)  |
| O(2)#1-Cu(1)-O(1)#3                                                                         | 168.81(10) |                     |            |
| Symmetry codes: #1 = x, -y+1, z; #2 = -x+1, -y+1, -z+2; #3 = -x+1, y, -z+2.                 |            |                     |            |
| <b>Compound 6</b>                                                                           |            |                     |            |
| Cu(1)-O(1)                                                                                  | 1.952(4)   | Cu(2)-O(1)#1        | 1.944(4)   |
| Cu(1)-O(3)                                                                                  | 1.971(4)   | Cu(2)-O(4)          | 1.963(4)   |
| Cu(1)-N(1)                                                                                  | 1.982(5)   | Cu(2)-N(3)#2        | 1.978(5)   |
| Cu(1)-N(2)                                                                                  | 1.988(5)   | Cu(2)-O(7)#3        | 2.128(11)  |
| Cu(1)-O(2)                                                                                  | 2.513(9)   | Cu(2)-O(1)          | 2.290(5)   |
| O(1)-Cu(1)-O(3)                                                                             | 90.68(18)  | O(1)#1-Cu(2)-O(4)   | 173.4(2)   |
| O(1)-Cu(1)-N(1)                                                                             | 89.06(19)  | O(1)#1-Cu(2)-N(3)#2 | 87.83(18)  |
| O(3)-Cu(1)-N(1)                                                                             | 171.3(2)   | O(4)-Cu(2)-N(3)#2   | 88.95(19)  |
| O(1)-Cu(1)-N(2)                                                                             | 174.3(2)   | O(1)#1-Cu(2)-O(7)#3 | 93.2(3)    |
| O(3)-Cu(1)-N(2)                                                                             | 86.4(2)    | O(4)-Cu(2)-O(7)#3   | 93.4(3)    |
| N(1)-Cu(1)-N(2)                                                                             | 94.6(2)    | N(3)#2-Cu(2)-O(7)#3 | 125.4(4)   |
| O(1)-Cu(1)-O(2)                                                                             | 90.6(3)    | O(1)#1-Cu(2)-O(1)   | 81.35(19)  |
| O(3)-Cu(1)-O(2)                                                                             | 89.1(3)    | O(4)-Cu(2)-O(1)     | 94.03(18)  |
| N(1)-Cu(1)-O(2)                                                                             | 99.7(3)    | N(3)#2-Cu(2)-O(1)   | 105.9(2)   |
| N(2)-Cu(1)-O(2)                                                                             | 84.5(3)    | O(7)#3-Cu(2)-O(1)   | 128.3(4)   |
| Symmetry codes: #1 = -x+2, -y+1, -z+2; #2 = -y+5/4, x-1/4, z-1/4; #3 = -x+3/2, -y+1, z+1/2. |            |                     |            |
| <b>Compound 7</b>                                                                           |            |                     |            |
| Zn(1)-O(2)#1                                                                                | 1.955(3)   | Zn(2)-O(6)          | 1.936(3)   |
| Zn(1)-N(3)                                                                                  | 1.983(4)   | Zn(2)-N(4)          | 1.986(4)   |
| Zn(1)-N(1)#2                                                                                | 2.008(4)   | Zn(2)-N(8)#3        | 1.991(4)   |
| Zn(1)-N(7)#3                                                                                | 2.022(4)   | Zn(2)-N(5)          | 2.008(4)   |
| O(2)#1-Zn(1)-N(3)                                                                           | 126.03(15) | O(6)-Zn(2)-N(4)     | 112.19(16) |
| O(2)#1-Zn(1)-N(1)#2                                                                         | 109.52(15) | O(6)-Zn(2)-N(8)#3   | 116.10(15) |
| N(3)-Zn(1)-N(1)#2                                                                           | 107.39(15) | N(4)-Zn(2)-N(8)#3   | 109.25(15) |
| O(2)#1-Zn(1)-N(7)#3                                                                         | 98.68(15)  | O(6)-Zn(2)-N(5)     | 97.21(15)  |
| N(3)-Zn(1)-N(7)#3                                                                           | 107.01(15) | N(4)-Zn(2)-N(5)     | 108.28(16) |
| N(1)#2-Zn(1)-N(7)#3                                                                         | 106.46(16) | N(8)#3-Zn(2)-N(5)   | 113.18(16) |
| Symmetry codes: #1 = x+1/2, y+1/2, -z+3/2; #2 = x, -y+2, z+1/2; #3 = -x+1/2, -y+5/2, z+1/2. |            |                     |            |

**Table S2.** Hydrogen Bonds of complexes **3**, **4**, and **7**.

| Complex  | D-H...A              | d(D-H)<br>(Å) | d(H...A)<br>(Å) | d(D...A)<br>(Å) | <(D-H...A)<br>(deg) |
|----------|----------------------|---------------|-----------------|-----------------|---------------------|
| <b>3</b> | N(4)-H(4A) ...N(3)   | 0.86          | 2.39            | 3.129(12)       | 144.9               |
|          | N(4)-H(4B) ...O(8)   | 0.86          | 2.41            | 2.999(12)       | 125.7               |
| <b>4</b> | O(7) -H(7W1) ...O(5) | 0.75(6)       | 2.11(6)         | 2.836(5)        | 163(6)              |
| <b>7</b> | N2-H(2A) ...O(1)     | 0.86          | 2.05            | 2.834(6)        | 152.0               |
|          | N6-H(6A) ...O(2)     | 0.86          | 2.24            | 2.984(6)        | 144.6               |
|          | N6-H(6B) ...O(6)     | 0.86          | 2.31            | 2.964(6)        | 133.3               |
|          | N2-H(2B) ...O(2)     | 0.86          | 2.52            | 3.279(6)        | 147.1               |

**Table S3.** Crystallographic Data and Structure Refinement Details for **1** and **5**.

| Unit Cell of<br>Parameters of<br>complexes <b>1</b> , <b>5</b> |   | H <sub>2</sub> O | MeOH  | EtOH  | MeCN   | DMF    | 0.5 M<br>HCl aq. | 0.5 M<br>NaOH<br>aq. |
|----------------------------------------------------------------|---|------------------|-------|-------|--------|--------|------------------|----------------------|
| Complex<br><b>1</b>                                            | a | -                | 16.61 | 16.60 | 16.62  | 16.60. | -                | -                    |
|                                                                | b | -                | 20.39 | 20.38 | 20.40  | 20.38  | -                | -                    |
|                                                                | c | -                | 17.17 | 17.17 | 17.15  | 17.18  | -                | -                    |
|                                                                | α | -                | 90    | 90    | 90     | 90     | -                | -                    |
|                                                                | β | -                | 99.66 | 99.64 | 99.73  | 99.67  | -                | -                    |
|                                                                | γ | -                | 90    | 90    | 90     | 90     | -                | -                    |
|                                                                | V | -                | 5746  | 5729  | 5730   | 5732   | -                | -                    |
| Complex<br><b>5</b>                                            | a | 12.50            | -     | -     | 12.46  | -      | -                | -                    |
|                                                                | b | 22.27            | -     | -     | 22.20  | -      | -                | -                    |
|                                                                | c | 7.14             | -     | -     | 7.16   | -      | -                | -                    |
|                                                                | α | 90               | -     | -     | 90     | -      | -                | -                    |
|                                                                | β | 126.12           | -     | -     | 126.06 | -      | -                | -                    |
|                                                                | γ | 90               | -     | -     | 90     | -      | -                | -                    |
|                                                                | V | 1617             | -     | -     | 1596   | -      | -                | -                    |

**Table S4.** Crystallographic Data and Structure Refinement Details for **1** and **5**.

| Unit Cell of<br>Parameters of<br>complexes <b>2-4, 6-7</b> |   | H <sub>2</sub> O | MeOH   | EtOH   | MeCN   | DMF    | 0.5 M<br>HCl aq. | 0.5 M<br>NaOH<br>aq. |
|------------------------------------------------------------|---|------------------|--------|--------|--------|--------|------------------|----------------------|
| Complex<br><b>2</b>                                        | a | 25.08            | 25.07  | 25.10  | 25.09  | 25.08  | -                | -                    |
|                                                            | b | 25.08            | 25.07  | 25.10  | 25.09  | 25.08  | -                | -                    |
|                                                            | c | 15.03            | 15.02  | 15.04  | 15.01  | 15.02  | -                | -                    |
|                                                            | α | 90               | 90     | 90     | 90     | 90     | -                | -                    |
|                                                            | β | 90               | 90     | 90     | 90     | 90     | -                | -                    |
|                                                            | γ | 90               | 90     | 90     | 90     | 90     | -                | -                    |
|                                                            | V | 9454             | 9440   | 9475   | 9449   | 9437   | -                | -                    |
| Complex<br><b>3</b>                                        | a | 25.38            | 25.36  | 25.39  | 25.37  | 25.38  |                  |                      |
|                                                            | b | 25.38            | 25.36  | 25.39  | 25.37  | 25.38  |                  |                      |
|                                                            | c | 15.20            | 15.21  | 15.22  | 15.19  | 15.20  |                  |                      |
|                                                            | α | 90               | 90     | 90     | 90     | 90     | -                | -                    |
|                                                            | β | 90               | 90     | 90     | 90     | 90     | -                | -                    |
|                                                            | γ | 90               | 90     | 90     | 90     | 90     | -                | -                    |
|                                                            | V | 9791             | 9782   | 9811   | 9777   | 9791   |                  |                      |
| Complex<br><b>4</b>                                        | a | 23.44            | 24.49  | 23.46  | 23.46  | 23.44  | -                | -                    |
|                                                            | b | 7.13             | 7.09   | 7.13   | 7.06   | 7.10   |                  |                      |
|                                                            | c | 32.51            | 32.06  | 32.51  | 32.17  | 32.19  |                  |                      |
|                                                            | α | 90               | 90     | 90     | 90     | 90     |                  |                      |
|                                                            | β | 105.77           | 104.74 | 105.77 | 104.76 | 104.97 | -                | -                    |
|                                                            | γ | 90               | 90     | 90     | 90     | 90     | -                | -                    |
|                                                            | V | 5229             | 5163   | 5193   | 5149   | 5176   | -                | -                    |
| Complex<br><b>6</b>                                        | a | 24.35            | 24.33  | 24.39  | 24.37  | 24.36  | -                | -                    |
|                                                            | b | 24.35            | 24.33  | 24.39  | 24.37  | 24.36  | -                | -                    |
|                                                            | c | 15.07            | 15.10  | 15.08  | 15.06  | 15.09  | -                | -                    |
|                                                            | α | 90               | 90     | 90     | 90     | 90     | -                | -                    |
|                                                            | β | 90               | 90     | 90     | 90     | 90     | -                | -                    |
|                                                            | γ | 90               | 90     | 90     | 90     | 90     | -                | -                    |
|                                                            | V | 8935             | 8838   | 8970   | 8944   | 8954   | -                | -                    |
| Complex<br><b>7</b>                                        | a | 9.82             | 9.85   | 9.86   | 9.86   | 9.84   | -                | -                    |
|                                                            | b | 16.54            | 16.56  | 16.59  | 16.59  | 16.52  | -                | -                    |
|                                                            | c | 30.55            | 30.63  | 30.67  | 30.66  | 30.59  | -                | -                    |
|                                                            | α | 90               | 90     | 90     | 90     | 90     | -                | -                    |
|                                                            | β | 90               | 90     | 90     | 90     | 90     | -                | -                    |
|                                                            | γ | 90               | 90     | 90     | 90     | 90     | -                | -                    |
|                                                            | V | 4959             | 4998   | 5018   | 5017   | 4974   | -                | -                    |

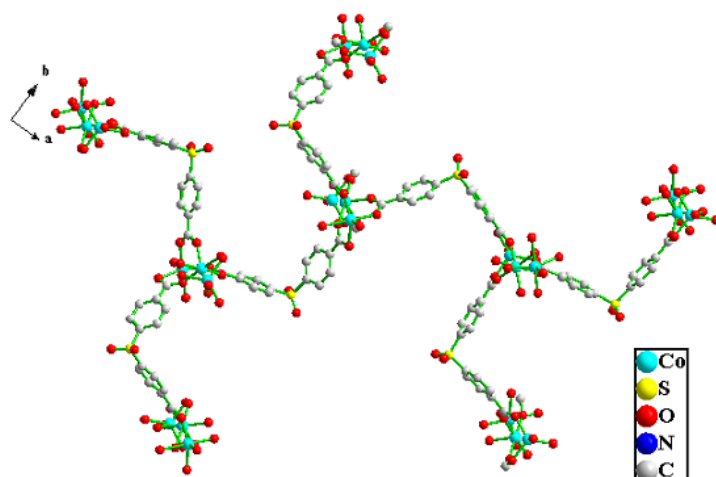

**Figure S1.** View the 2D zigzag sheet along the c axis in **1**.

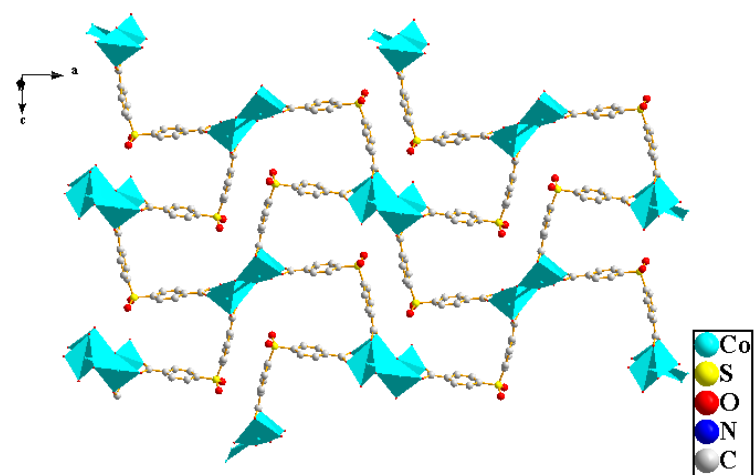

**Figure S2.** View the 2D sheet in ac plane of **2**.

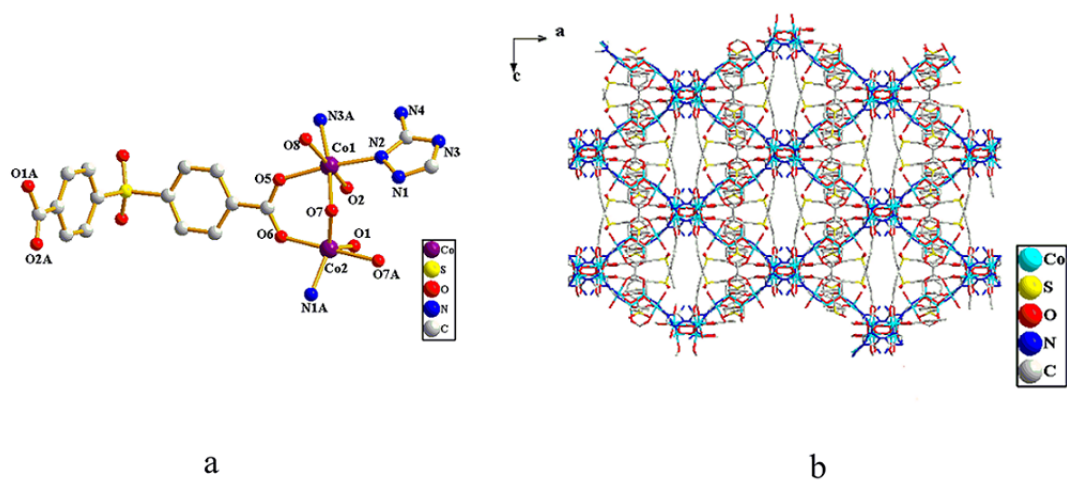

**Figure S3.** (a) Coordination environment of Co(II) ion in **3** with hydrogen atoms omitted for clarity. (b) View the 3D “onion” framework along the b axis in **3**.

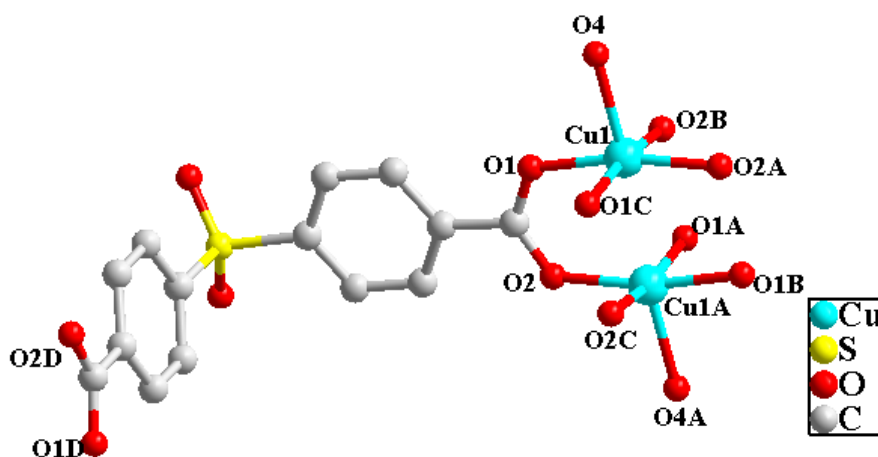

**Figure S4.** Coordination environment of Cu(II) ion in **5** with hydrogen atoms omitted for clarity.

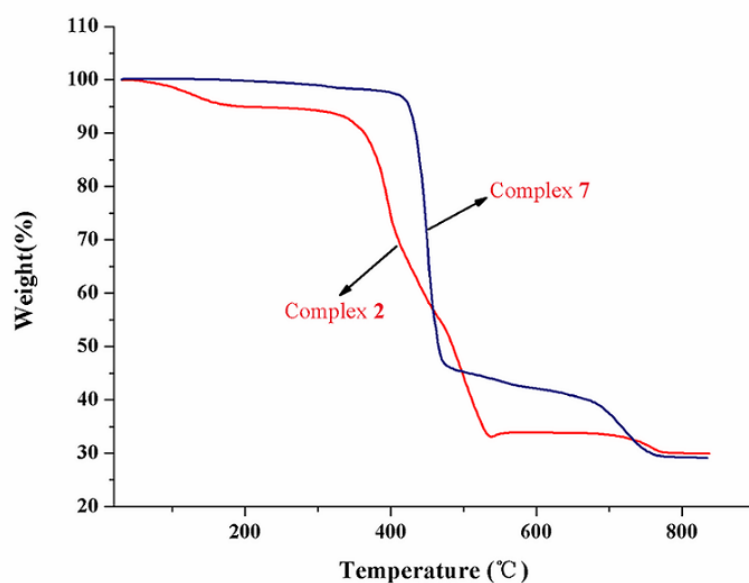

**Figure S5.** TGA curves of complexes **2** and **7**.

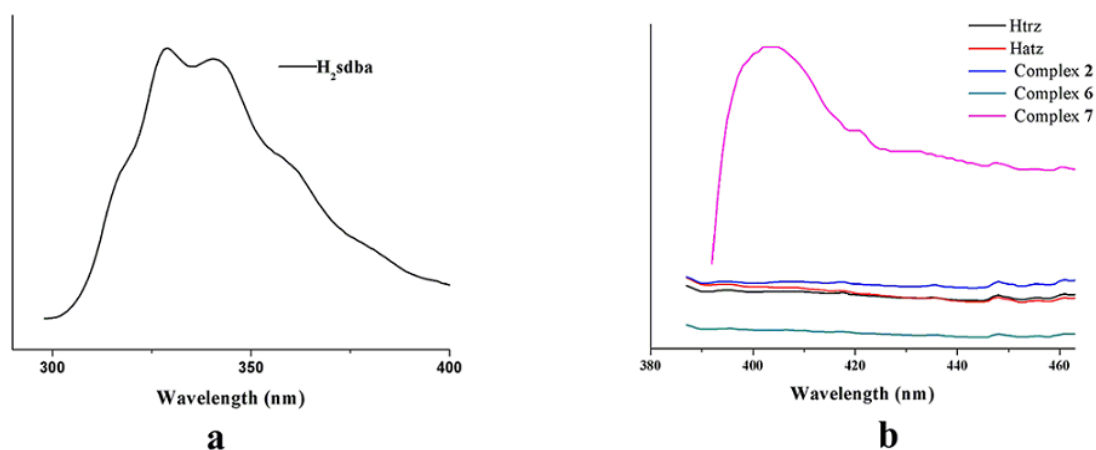

**Figure S6.** Solid-state photoluminescent spectra of **2**, **6**, **7** and corresponding ligands at room temperature.
